# Supplementary material for: Organic Solvent-Free Olefins and Alcohols (ep)oxidation Using Recoverable Catalysts Based on [PM12O40]3− (M = Mo or W) Ionically Grafted on Amino Functionalized Silica Nanobeads
Source: PubMed Central journal article supplement (PMC6829895; doi:10.3390/ma12203278), 2019-10-09
Supplement: materials-12-03278-s001.pdf [file materials-12-03278-s001.pdf]

Supplementary Materials

# Organic Solvent-Free Olefins and Alcohols (ep)oxidation Using Recoverable Catalysts Based on $[\text{PM}_{12}\text{O}_{40}]^{3-}$ (M= Mo or W) Ionically Grafted on Amino Functionalized Silica Nanobeads

Yun Wang <sup>1,2</sup>, Florence Gayet <sup>1,3</sup>, Pascal Guillo <sup>1,2</sup> and Dominique Agustin <sup>1,2,\*</sup>

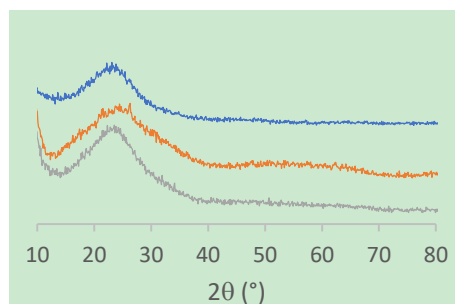

**Figure S1.** Powder X-ray diffraction diagrams of  $\text{SiO}_2$  (blue),  $\text{SiO}_2\text{@PW}$  (orange) and  $\text{SiO}_2\text{@PMo}$  (grey) particles.

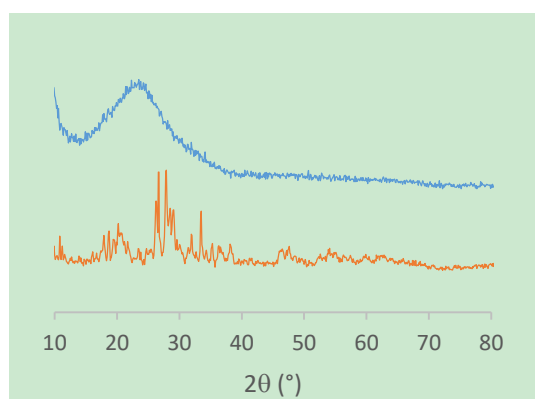

(a)

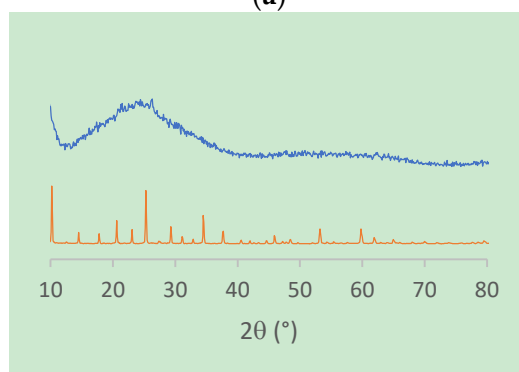

(b)

**Figure S2.** Comparison of Powder X-ray diffractions of (a)  $\text{H}_3\text{PMo}_{12}\text{O}_{40}$  (orange) and  $\text{SiO}_2\text{@PMo}$  (blue) and (b)  $\text{H}_3\text{PW}_{12}\text{O}_{40}$  (orange) and  $\text{SiO}_2\text{@PW}$  (blue). The intensities of  $\text{SiO}_2\text{@PMo}$  and  $\text{SiO}_2\text{@PW}$  were magnified 10 times.

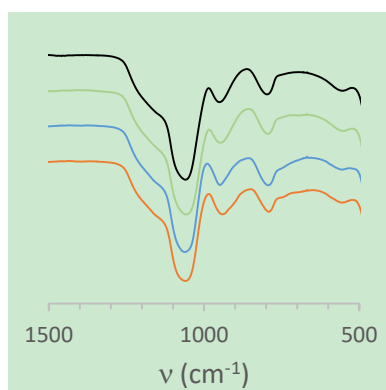

Figure S3. From up to down: Relevant IR vibration zones for  $\text{SiO}_2$ ,  $\text{SiO}_2@NH_2$ ,  $\text{SiO}_2@PW$ ,  $\text{SiO}_2@PMo$ .

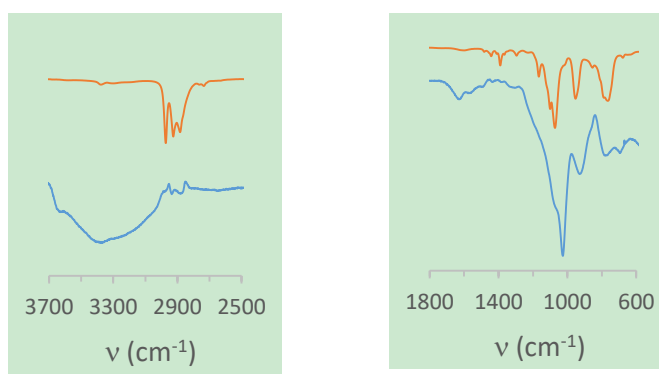

Figure S4. Difference spectra ( $\text{SiO}_2@NH_2 - \text{SiO}_2$ ) on specific ranges (in blue). The spectrum of APTES is indicated in orange.

Table S1. Relevant solid-state NMR data.

|                                                                      | $\text{SiO}_2$ | $\text{SiO}_2@NH_2$ | $\text{SiO}_2@PW$ | $\text{SiO}_2@PMo$ |
|----------------------------------------------------------------------|----------------|---------------------|-------------------|--------------------|
| <b><math>^1H</math> MAS</b>                                          |                |                     |                   |                    |
|                                                                      | 3.4-           | 0.9                 | 0.8               | 0.8                |
|                                                                      | 5.8-           | 1.2                 | 3.3               | 3.4                |
|                                                                      |                | 2.2                 | 4.0               | 4.0                |
|                                                                      |                | 3.6                 | 6.5               | 6.8                |
|                                                                      |                | 5.1                 |                   |                    |
| <b><math>^{13}C</math> CP MAS</b>                                    |                |                     |                   |                    |
| $CH_2O$                                                              |                | 60.4                | 59.9              | 59.9               |
| $CH_2O$                                                              |                | 58.2                | 58.2              | 58.2               |
| $CH_2N$                                                              |                | 50.9                | 50.8              | 50.9 (             |
| $CH_2N$                                                              |                | 42.3                | 42.8              | 42.9               |
| $CH_2$                                                               |                | 21.5                | 20.6              | 20.7               |
| $CH_3$                                                               |                | 16.5                | 16.6              | 16.6               |
| $CH_2Si$                                                             |                | 9.6                 | 9.2               | 8.8                |
| <b><math>^{29}Si</math> CP-MAS (deconvolution is in parenthesis)</b> |                |                     |                   |                    |
| T2                                                                   |                | -62.1               | -58.3             | -58.6              |
| T3                                                                   |                | -67.7               | -67.9             | -68.2              |
| Q2                                                                   | -93.3 (7)      | -92.8 (6)           | -93.0 (7)         | -93.0 (7)          |
| Q3                                                                   | -101.9 (49)    | -102.0 (57)         | -102.1 (67)       | -102.1 (66)        |
| Q4                                                                   | -111.8 (44)    | -111.5 (37)         | -111.7 (26)       | -111.7 (27)        |
| <b><math>^{29}Si</math> MAS (deconvolution is in parenthesis)</b>    |                |                     |                   |                    |
| Q2                                                                   | -93.5 (4)      | -92.4 (7)           | -92.6 (9)         | -92.8 (9)          |
| Q3                                                                   | -101.9 (32)    | -101.8 (37)         | -101.9 (33)       | -101.9 (27)        |

| Q4                                                             | -111.8 (64) | -111.6 (56) | -111.7 (58)            | -111.6 (64)              |
|----------------------------------------------------------------|-------------|-------------|------------------------|--------------------------|
| $^{31}\text{P}$ CP MAS (value of free POMs are in parenthesis) |             |             |                        |                          |
|                                                                |             |             | -12.8<br>(-15.8)       | -1.5<br>(-4.3,-5.0)      |
| $^{31}\text{P}$ MAS (value of free POMs are in parenthesis)    |             |             |                        |                          |
|                                                                |             |             | -13.4<br>(-15.4,-15.8) | -1.5,-4.7,-6.7<br>(-4.3) |

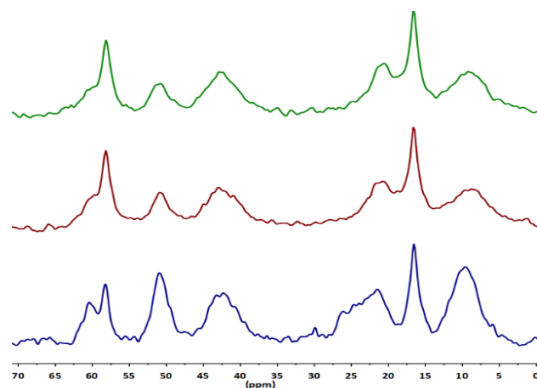

Figure S5.  $^{13}\text{C}$  MAS NMR spectra of  $\text{SiO}_2@\text{PW}$  (up),  $\text{SiO}_2@\text{PMo}$  (middle) and  $\text{SiO}_2@\text{NH}_2$  (down).

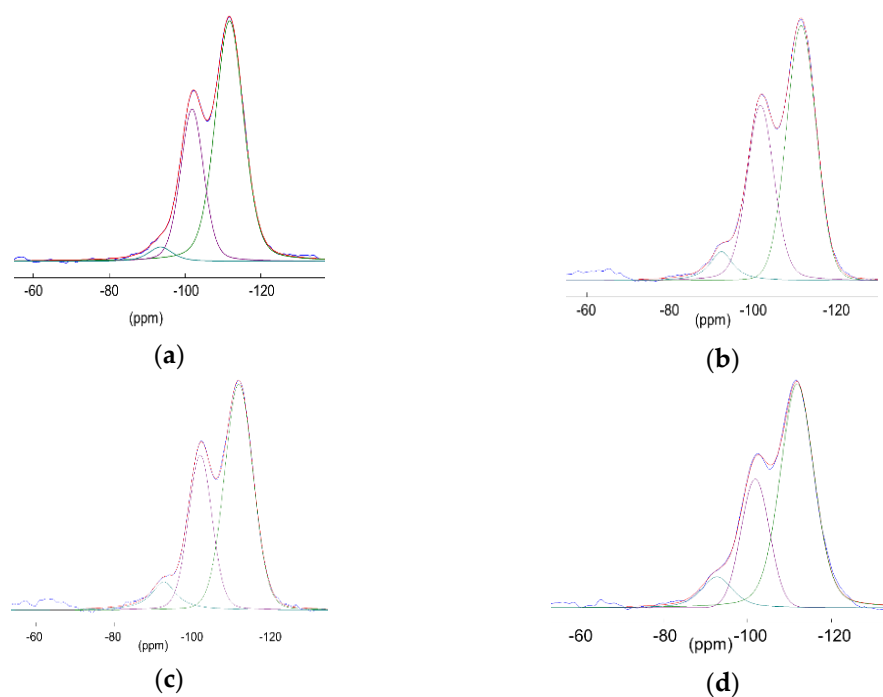

Figure S6.  $^{29}\text{Si}$  MAS NMR spectra of  $\text{SiO}_2$  (a)  $\text{SiO}_2@\text{NH}_2$  (b),  $\text{SiO}_2@\text{PW}$  (c) and  $\text{SiO}_2@\text{PMo}$  (d).

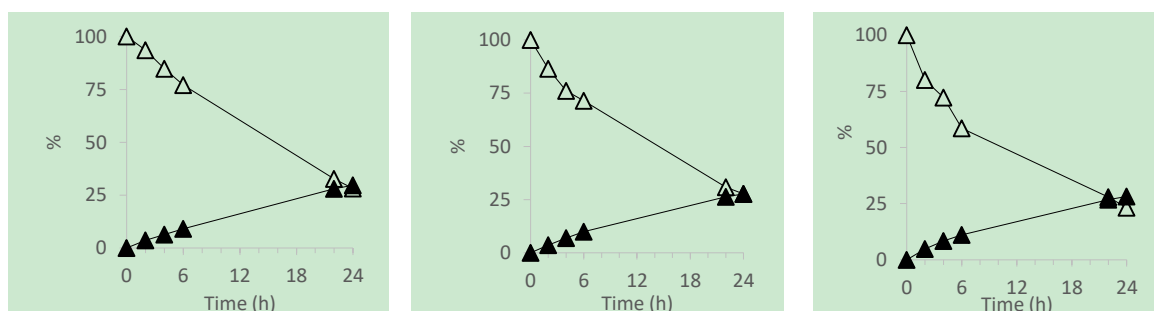

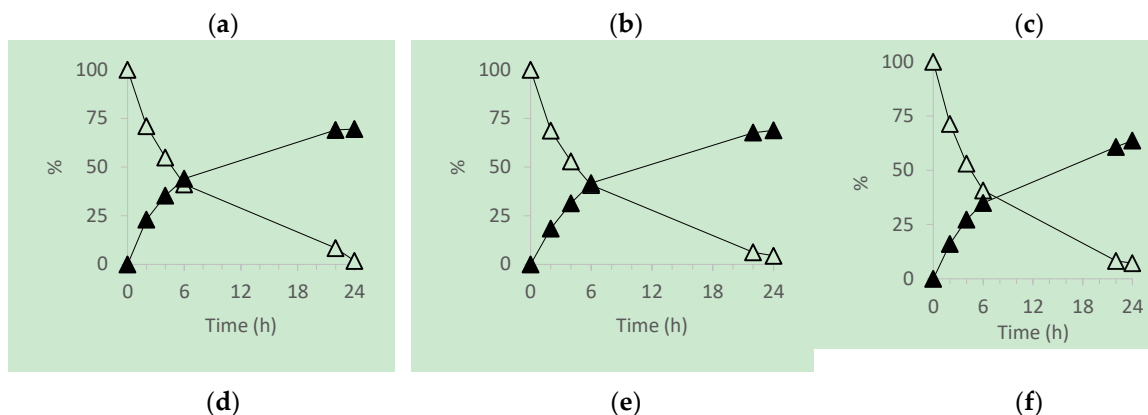

**Figure S7.** Evolution of CO ( $\triangle$ ) and COE ( $\blacktriangle$ ) with  $\text{SiO}_2\text{@PW}$  (Run 1 (a), Run 2 (b) and Run 3 (c)) and  $\text{SiO}_2\text{@PMo}$  (Run 1 (d), Run 2 (e) and Run 3 (f))

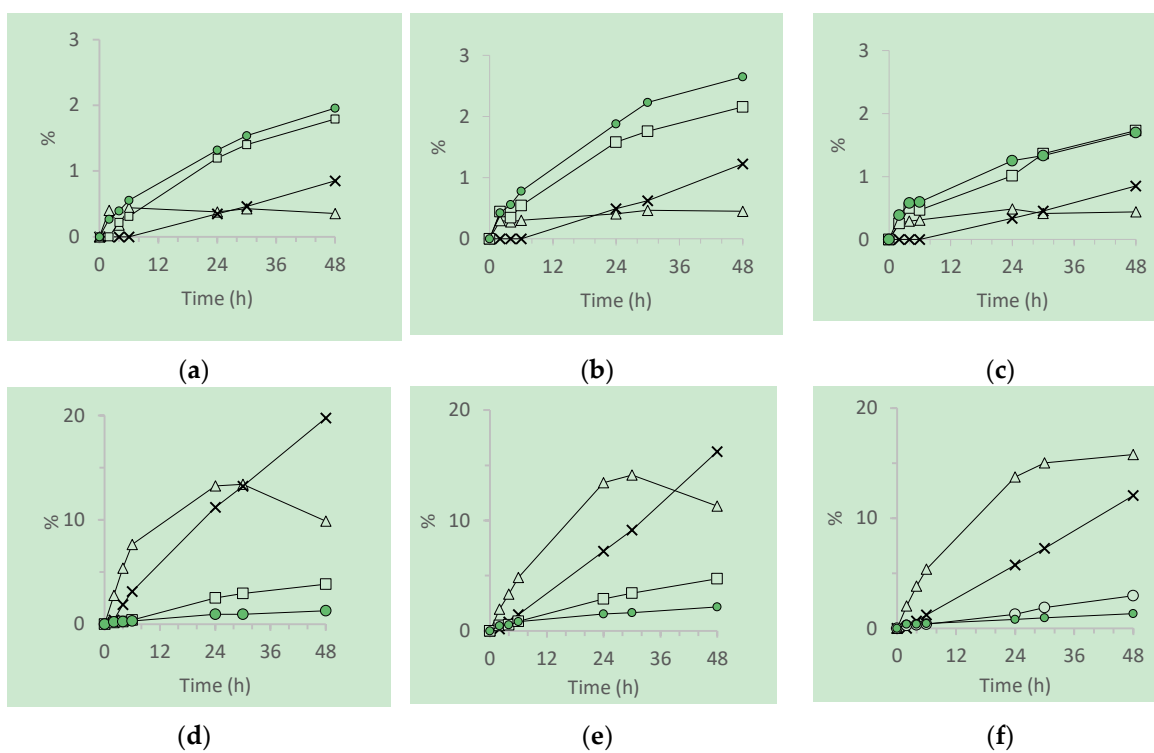

**Figure S8.** Evolution of CHO ( $\triangle$ ), CHD ( $\times$ ), CHol ( $\square$ ) and CHone ( $\bullet$ ) with  $\text{SiO}_2\text{@PW}$  (Run 1 (a), Run 2 (b) and Run 3 (c)) and  $\text{SiO}_2\text{@PMo}$  (Run 1 (d), Run 2 (e) and Run 3 (f))

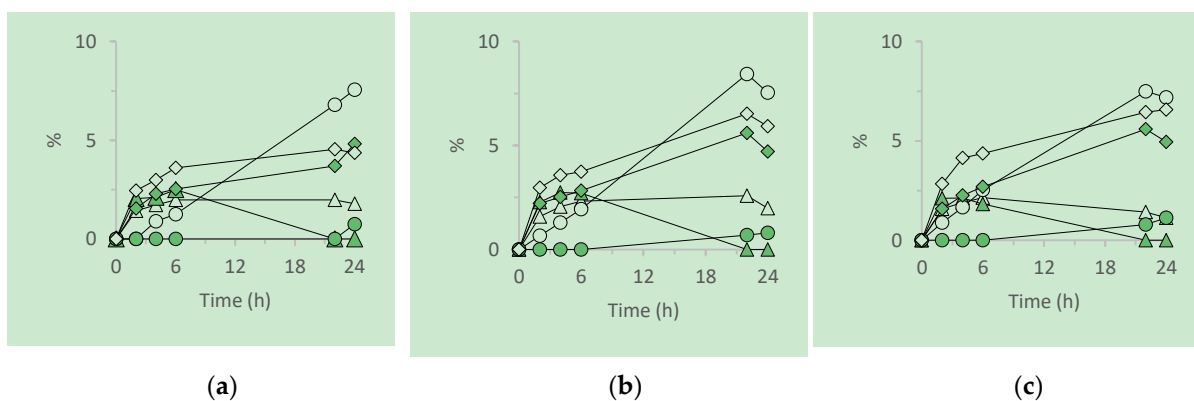

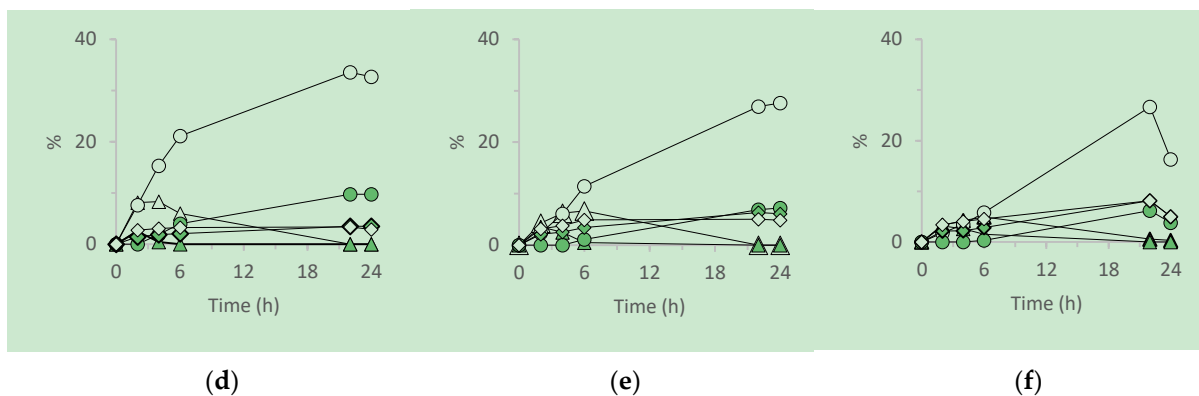

**Figure S9.** (a) Evolution of  $trans$ -LO ( $\triangle$ ),  $cis$ -LO CHD ( $\blacktriangle$ ), eq-LD ( $\bullet$ ), ax-LD ( $\circ$ ),  $C^{ol}$  ( $\diamond$ ) and  $C^{one}$  ( $\blacklozenge$ ) with  $SiO_2@PW$  (Run 1 (a), Run 2 (b) and Run 3 (c)) and  $SiO_2@PMo$  (Run 1 (d), Run 2 (e) and Run 3 (f))

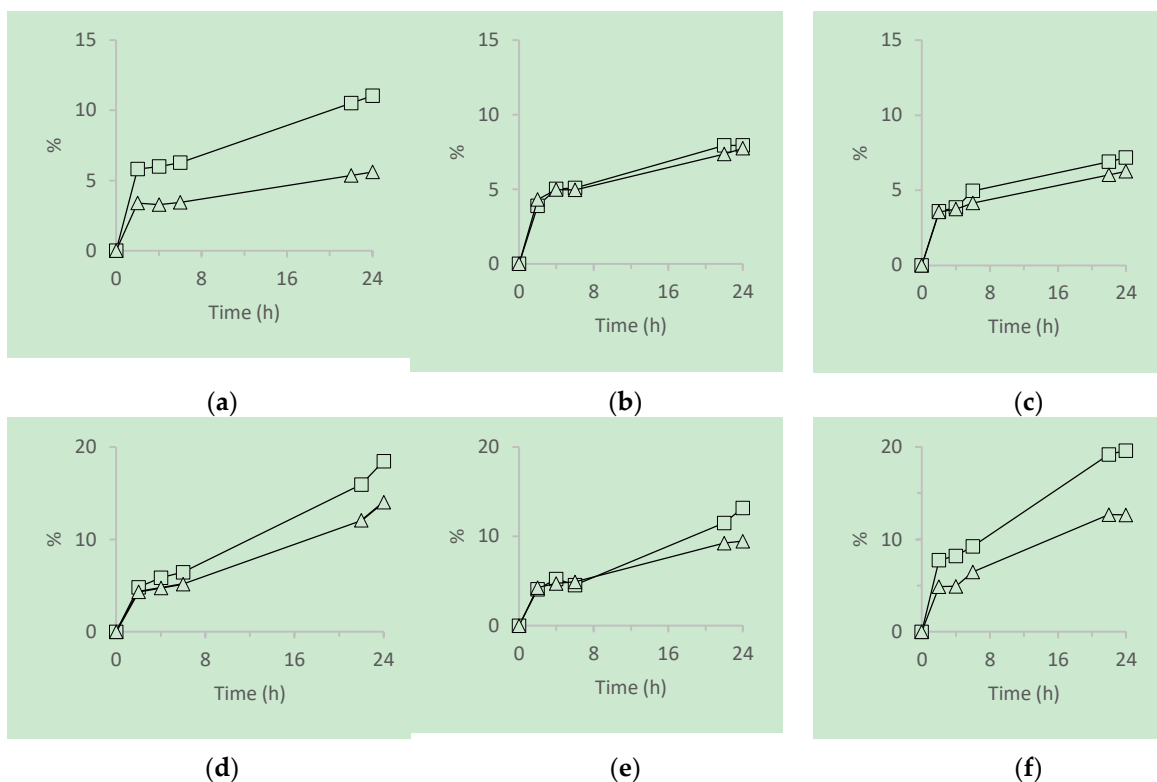

**Figure S10.** Conversion of  $CY^{ol}$  ( $\square$ ) and formation of  $CY^{one}$  ( $\triangle$ ) with  $SiO_2@PW$  (Run 1 (a), Run 2 (b) and Run 3 (c)) and  $SiO_2@PMo$  (Run 1 (d), Run 2 (e) and Run 3 (f))
